# Supplementary material for: Synthesis and characterization of new H-shaped triphenylene discotic room-temperature liquid crystal tetramers by a copper-free click reaction
Source: Royal Society of Chemistry journal article supplement (doi:10.1039/c7nj02695a), 2017-11-15

## **Electronic Supplementary information for New Journal of Chemistry**

### **Supporting Information**

Kan Zhang, Yuefeng Bai\*, Chun Feng, Guanghui Ning, Hailiang Ni, Wenhao Yu,  
Keqing Zhao, Biqin Wang and Ping Hu\*

College of Chemistry and Materials Science, Sichuan Normal University, Chengdu, P. R. China

E-mail: byf610327@163.com; hp\_x@163.com

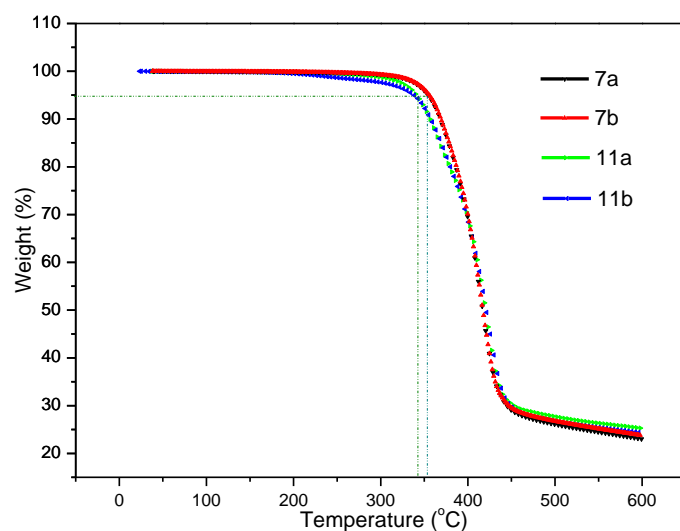

Figure S1. The TGA traces of the compounds **7a**, **7b**, **11a** and **11b** under nitrogen atmosphere, and the heating rate is 10 °C /min.

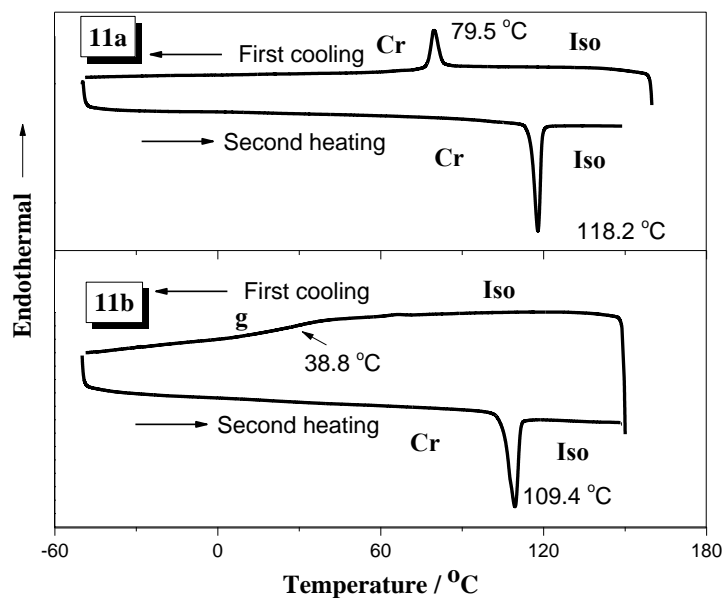

Figure S2. The DSC traces of the compounds **11a** and **11b** on the second heating and first cooling circles at 10 °C / min.

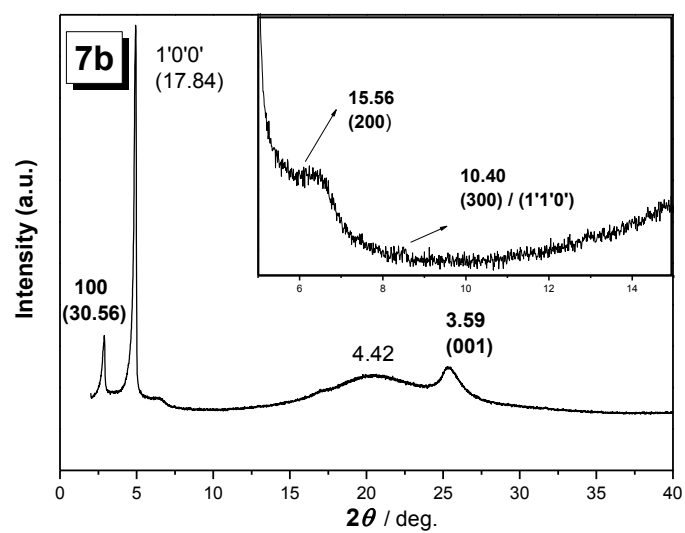

**Figure S3.** The XRD pattern of **7b** at 25 °C on cooling.

The  $^1\text{H}$  NMR spectra of compound **1**

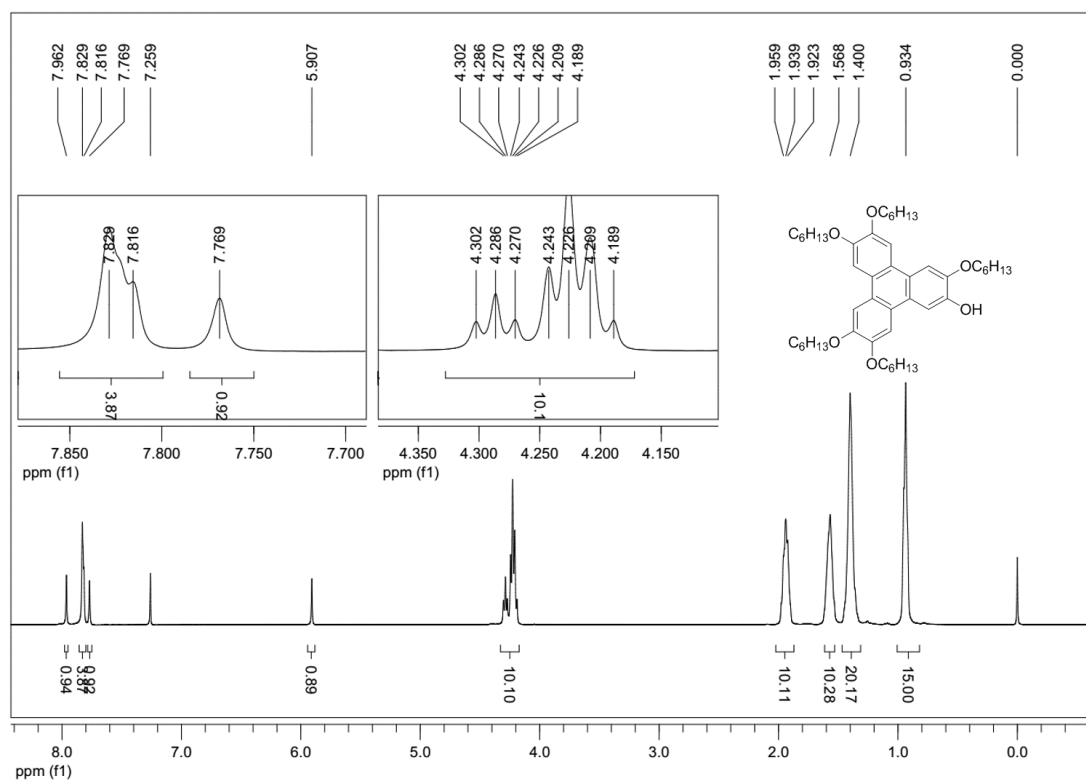

The  $^{13}\text{C}$  NMR spectra of compound **1**

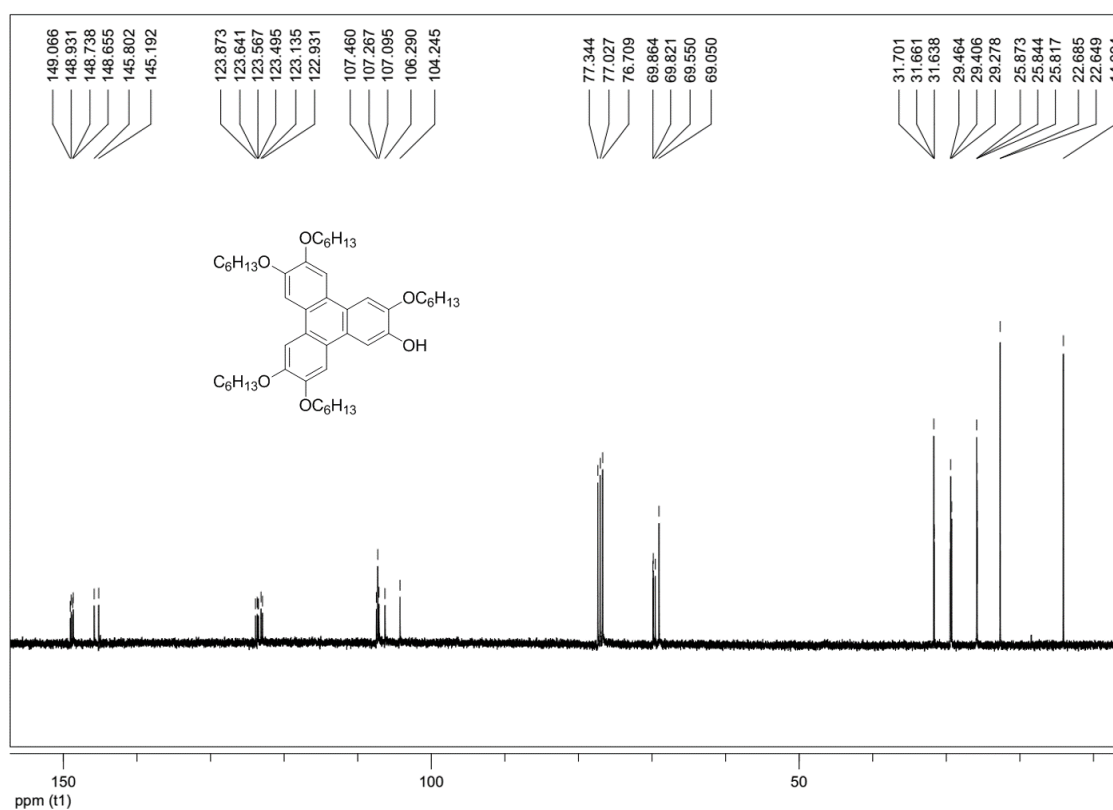

The  $^1\text{H}$  NMR spectra of compound **2**

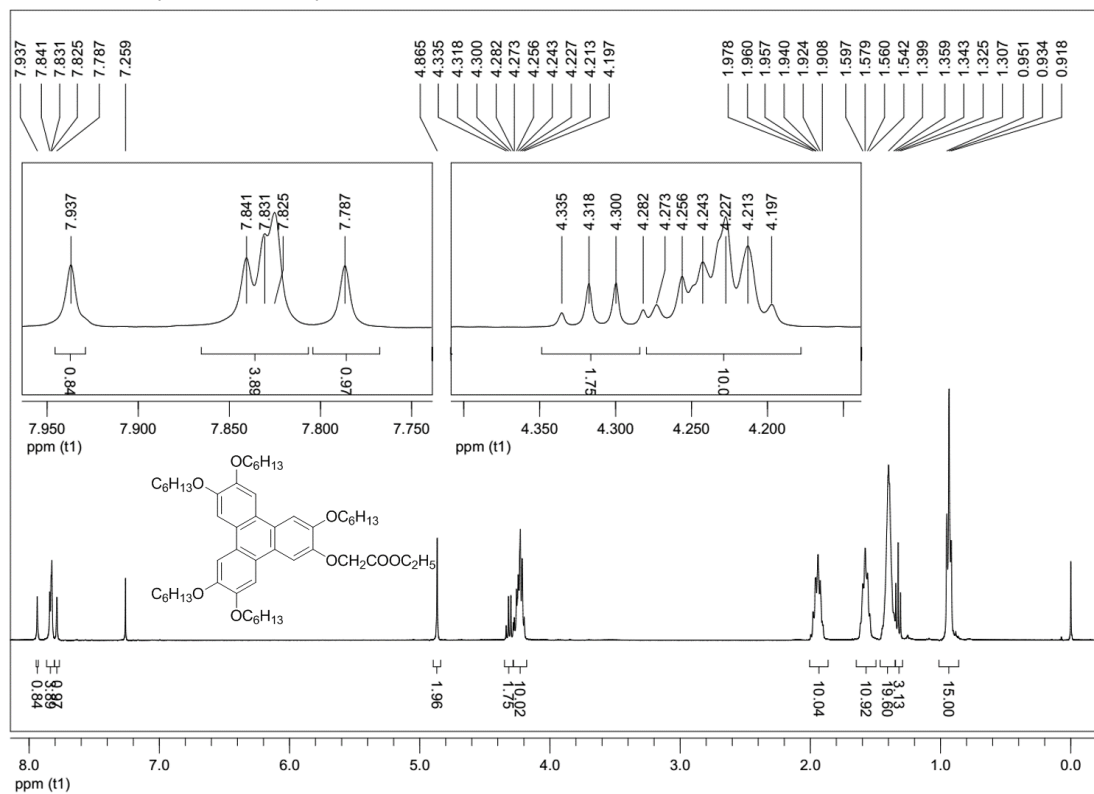

The  $^{13}\text{C}$  NMR spectra of compound **2**

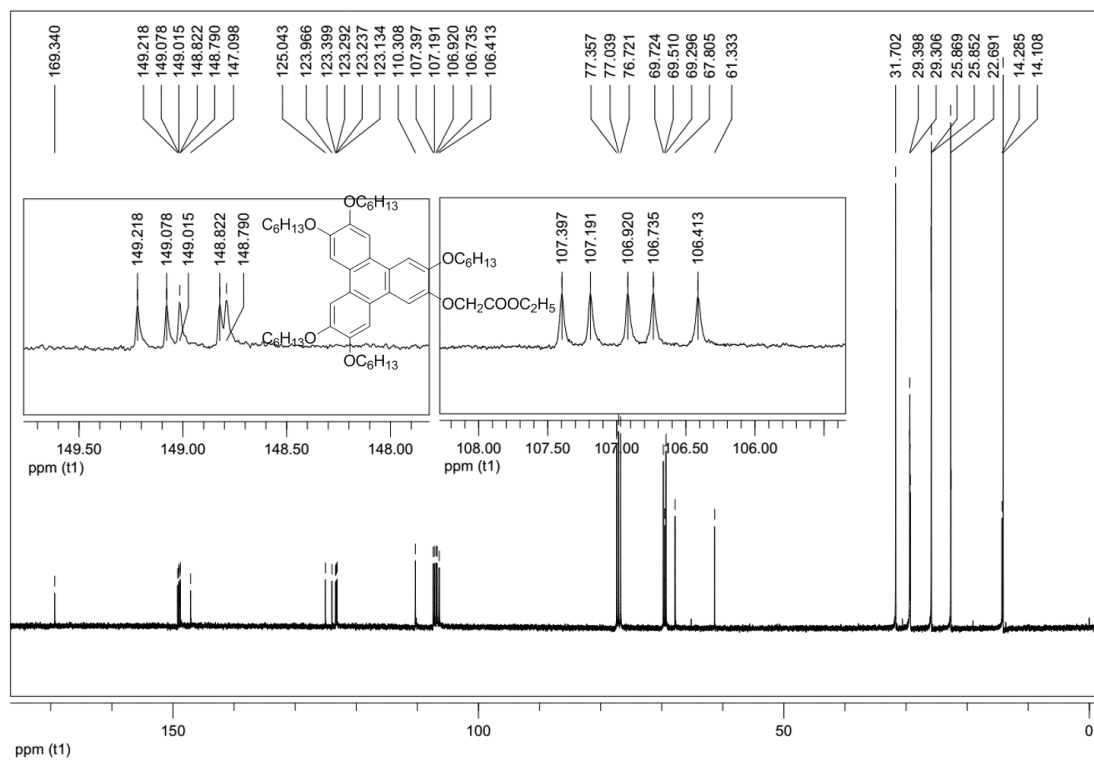

The  $^1\text{H}$  NMR spectra of compound **3**

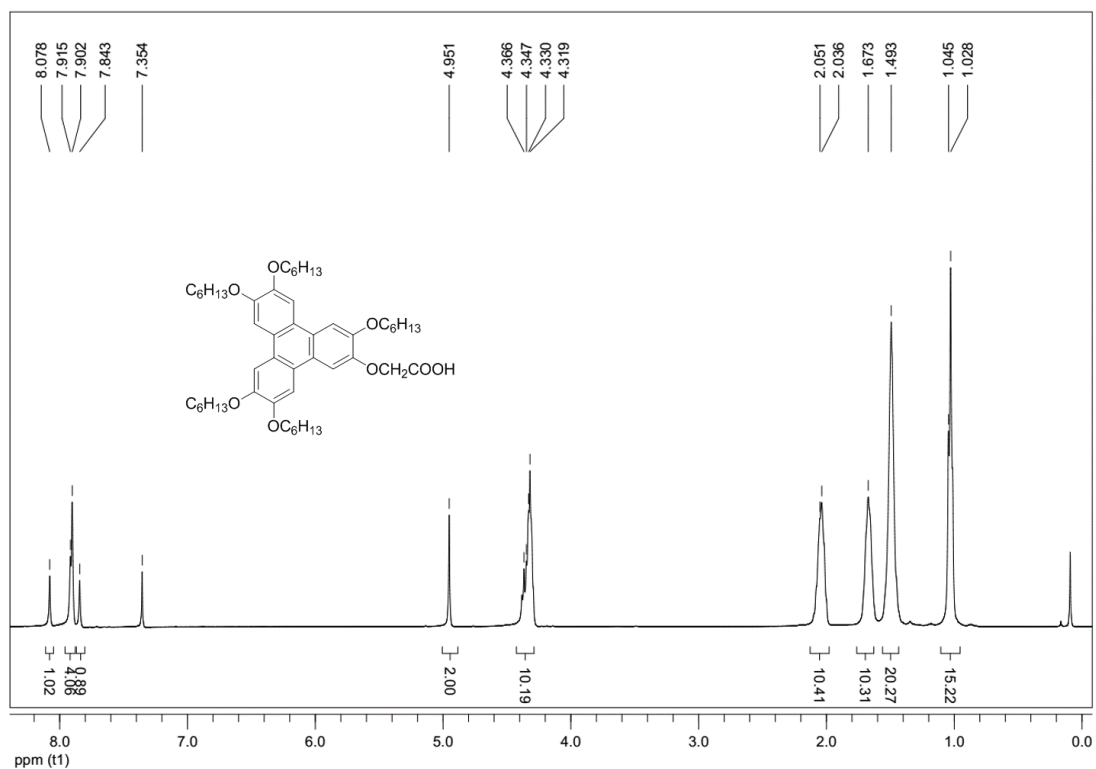

The  $^{13}\text{C}$  NMR spectra of compound **3**

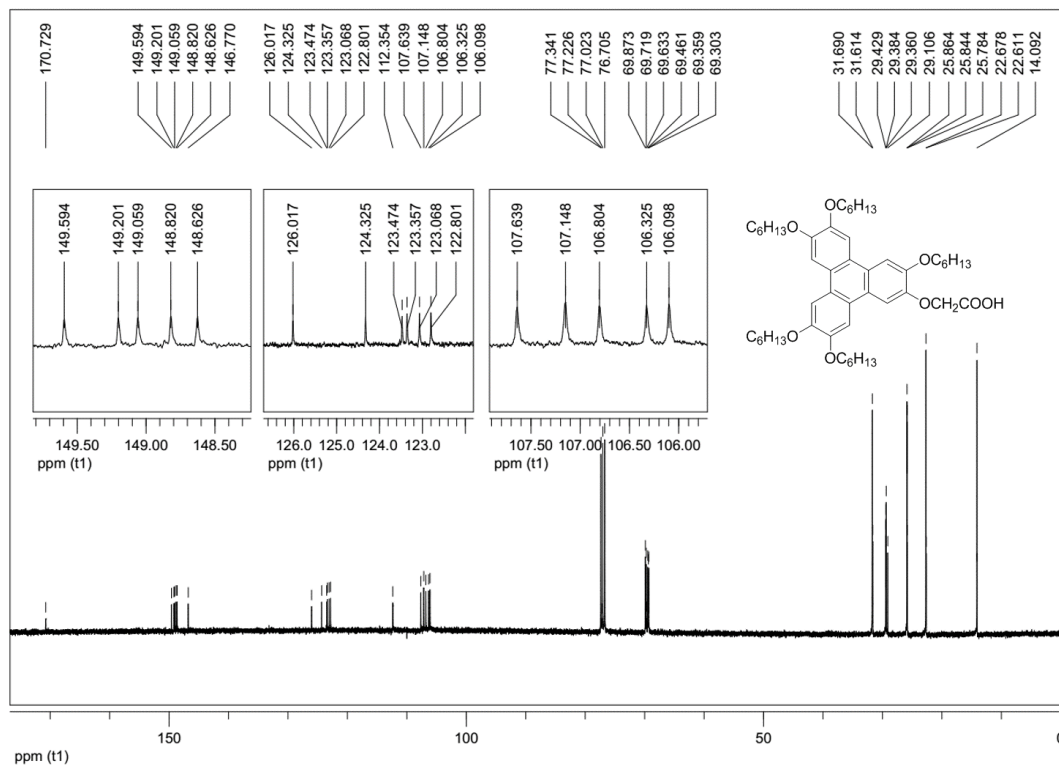

The  $^1\text{H}$  NMR spectra of compound **4**

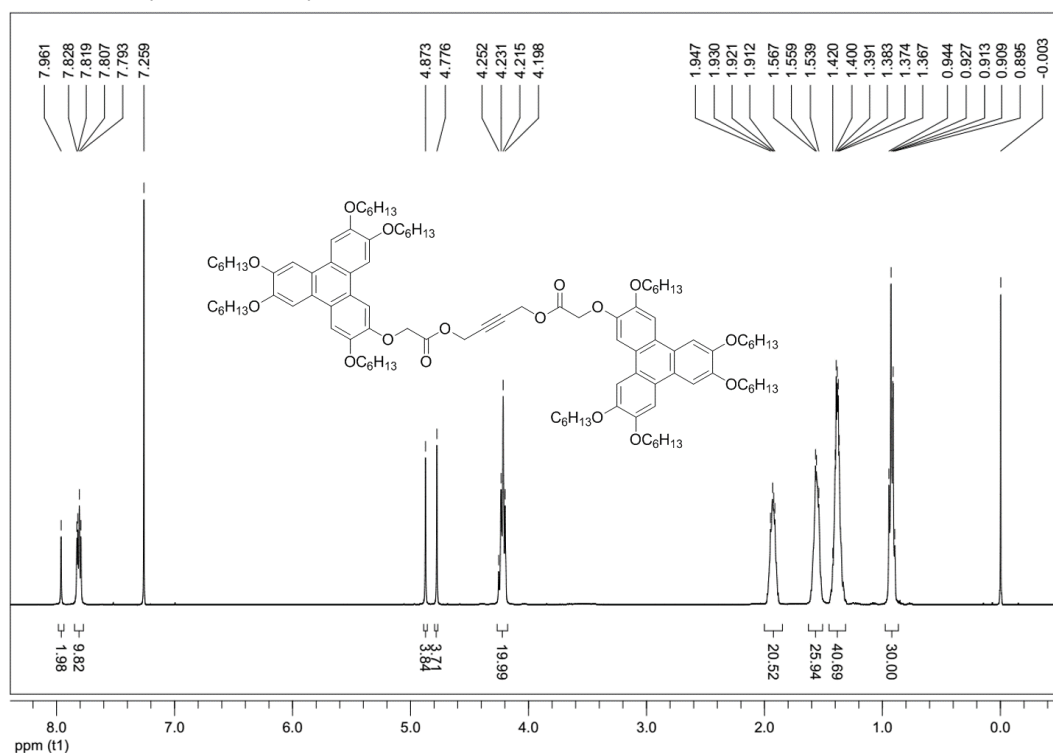

The  $^{13}\text{C}$  NMR spectra of compound **4**

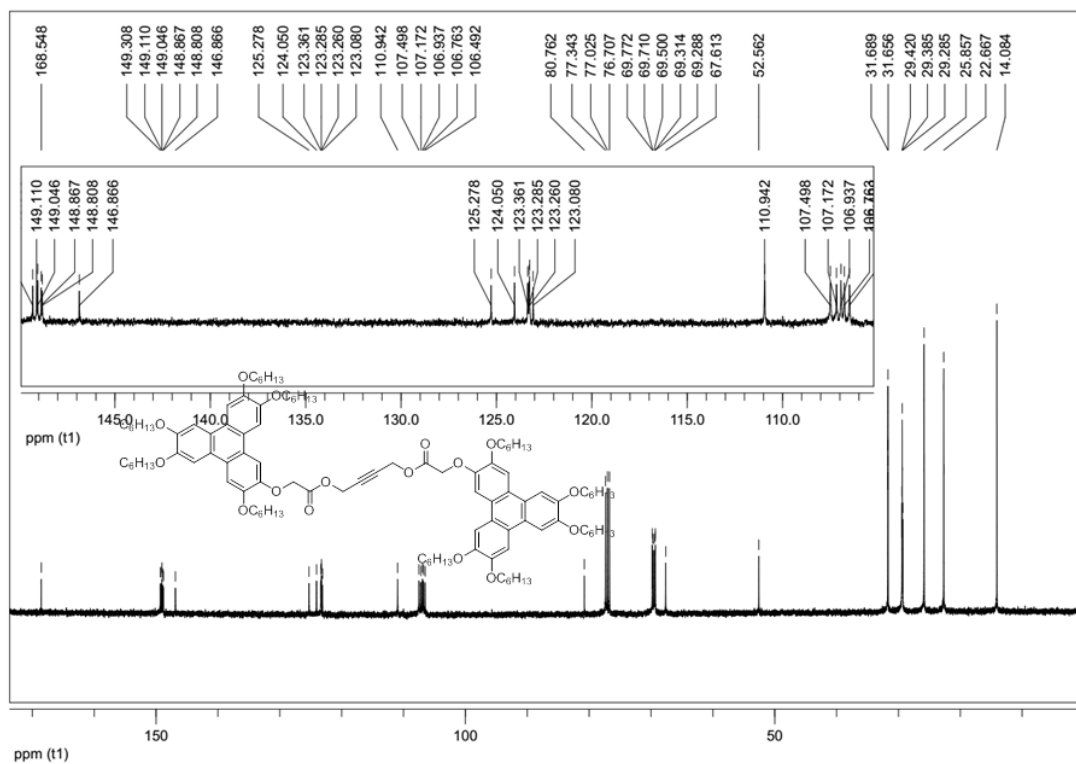

The  $^1\text{H}$  NMR spectra of compound **6a**

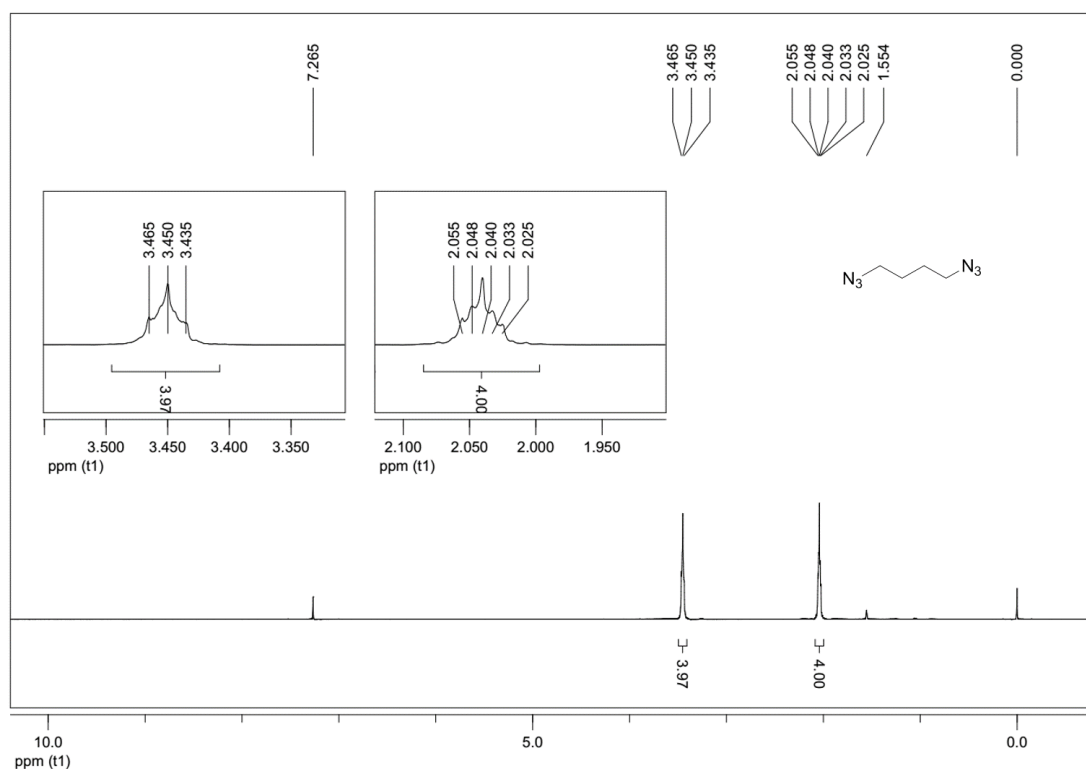

The  $^{13}\text{C}$  NMR spectra of compound **6a**

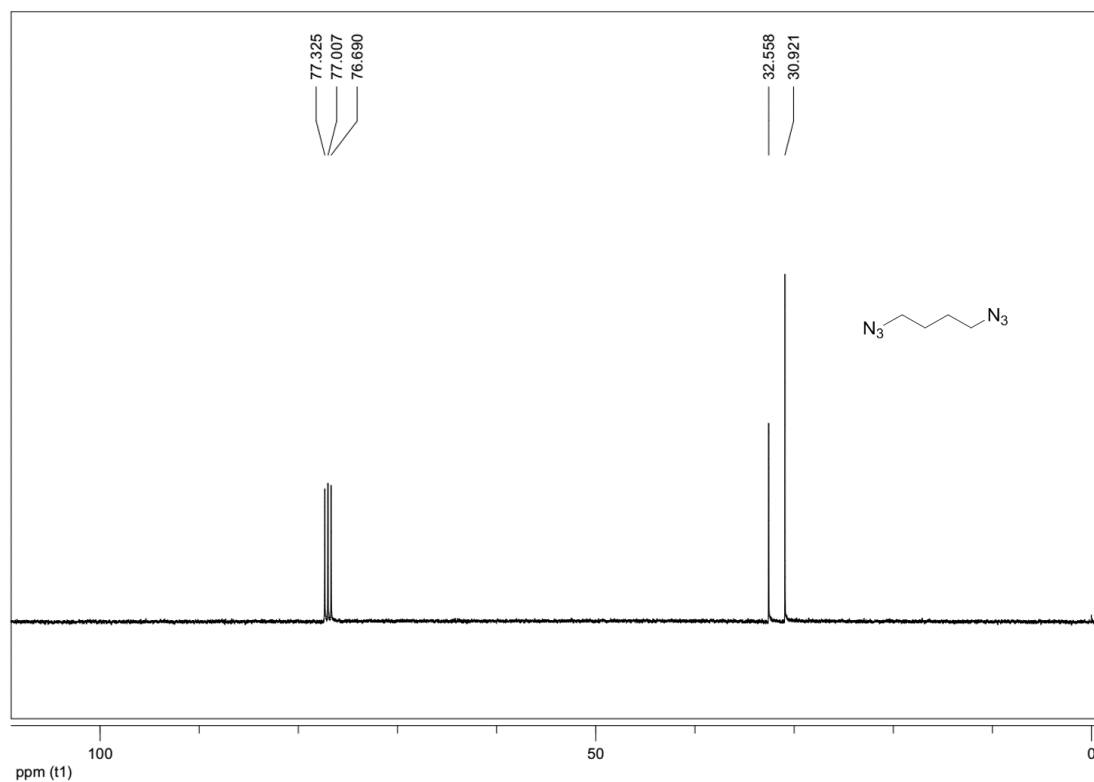



The  $^1\text{H}$  NMR spectra of compound **6b**

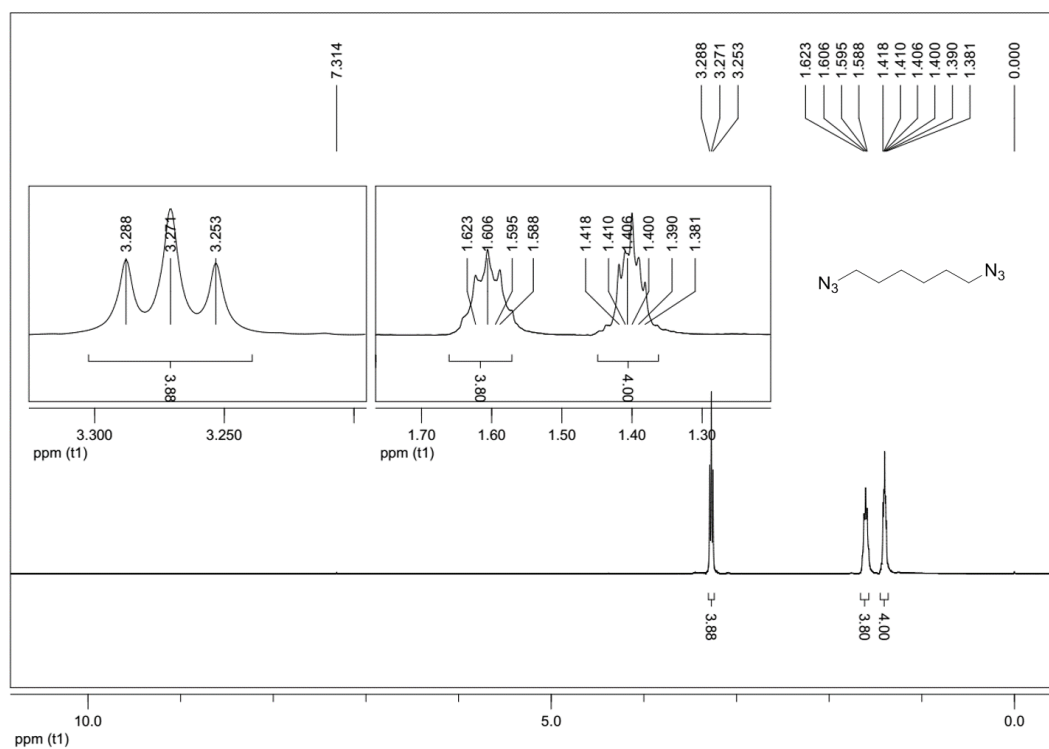

The  $^{13}\text{C}$  NMR spectra of compound **6b**

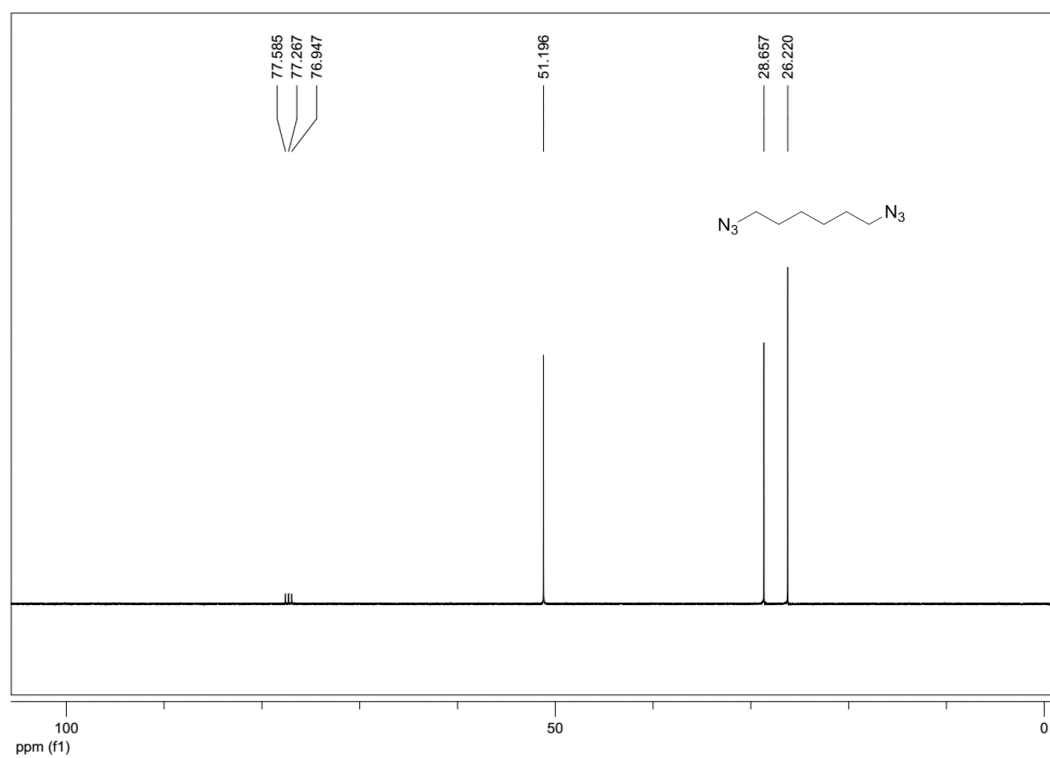

The  $^1\text{H}$  NMR spectra of compound **7a**

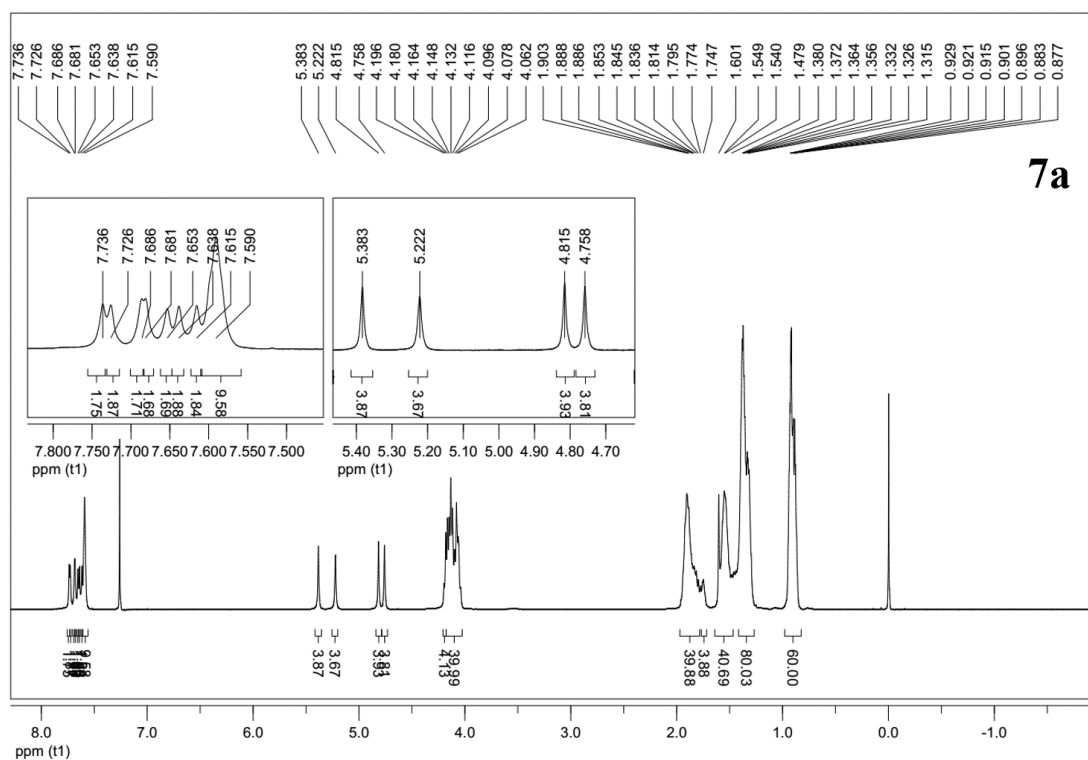

The  $^{13}\text{C}$  NMR spectra of compound **7a**

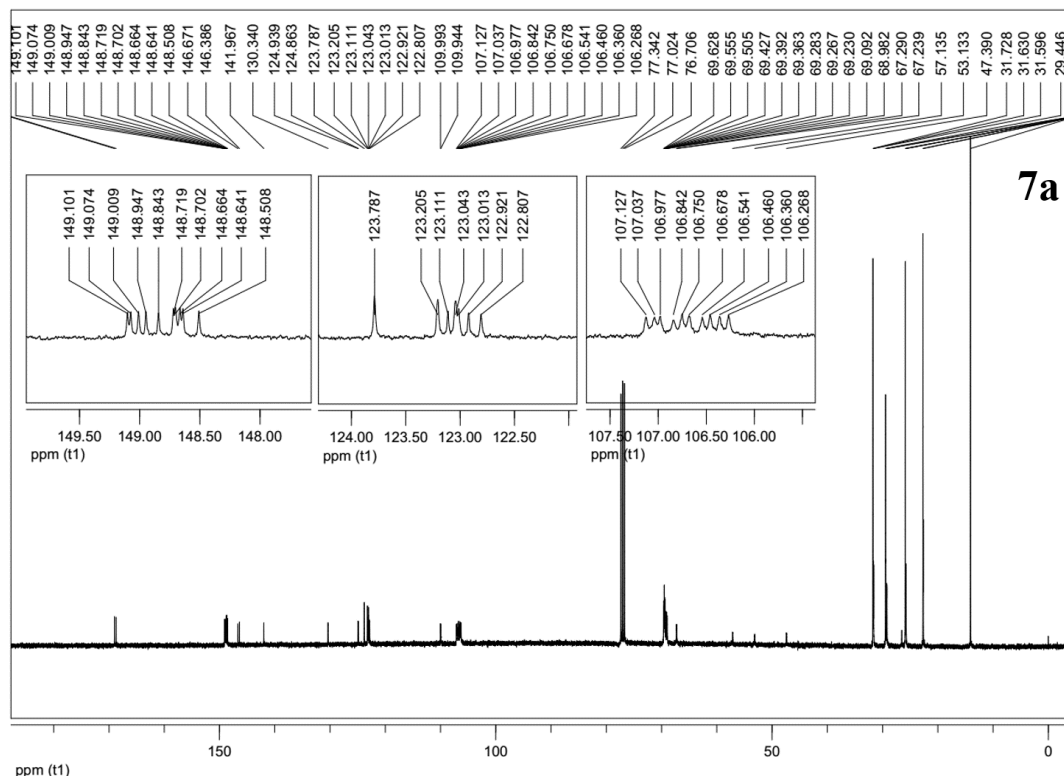

The  $^1\text{H}$  NMR spectra of compound **7b**

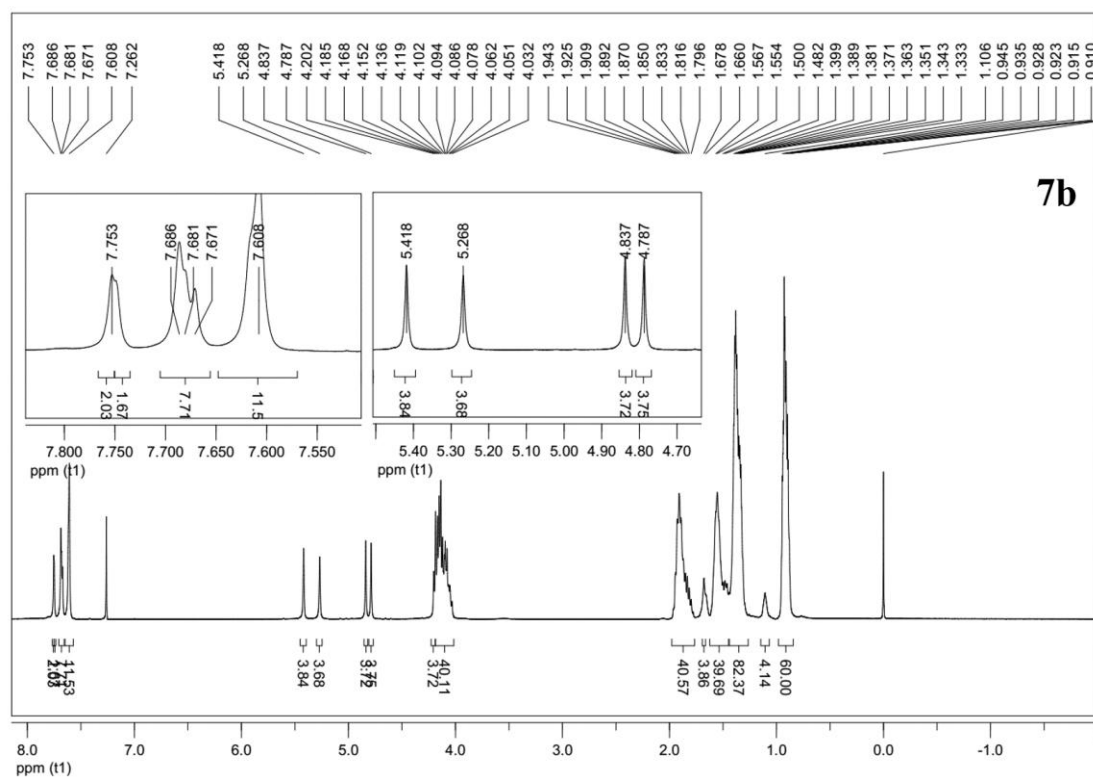

The  $^{13}\text{C}$  NMR spectra of compound **7b**

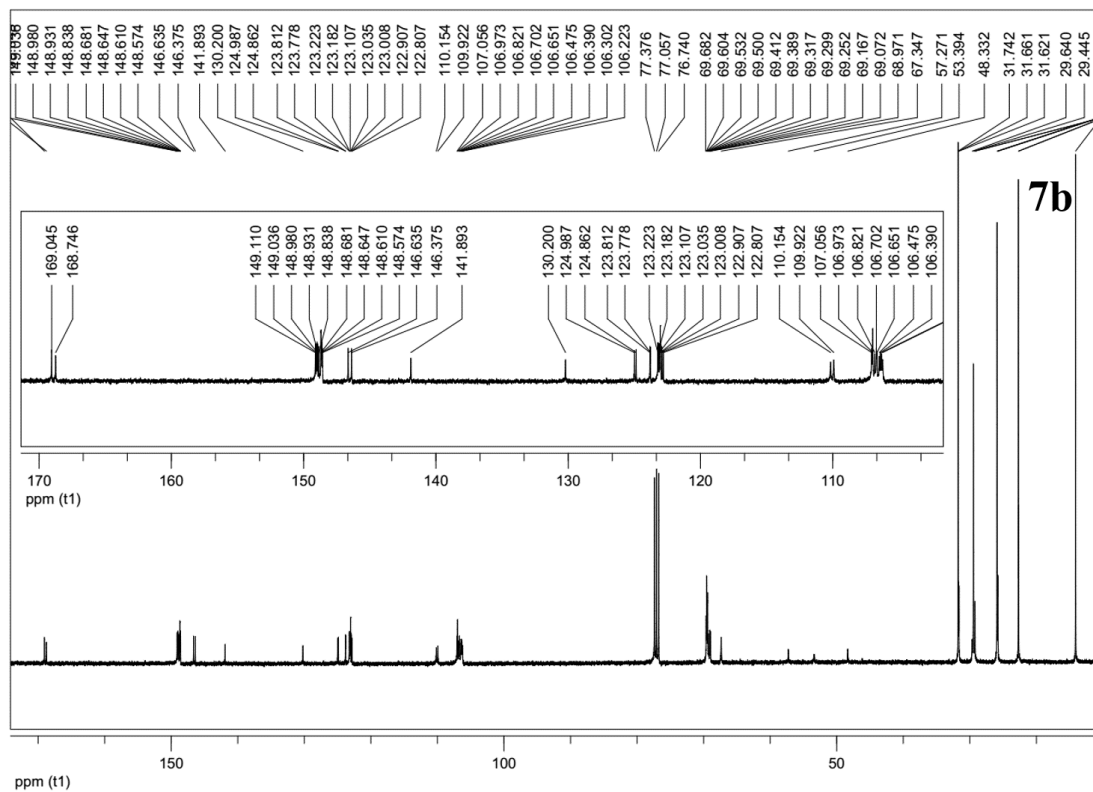

The  $^1\text{H}$  NMR spectra of compound **9a**

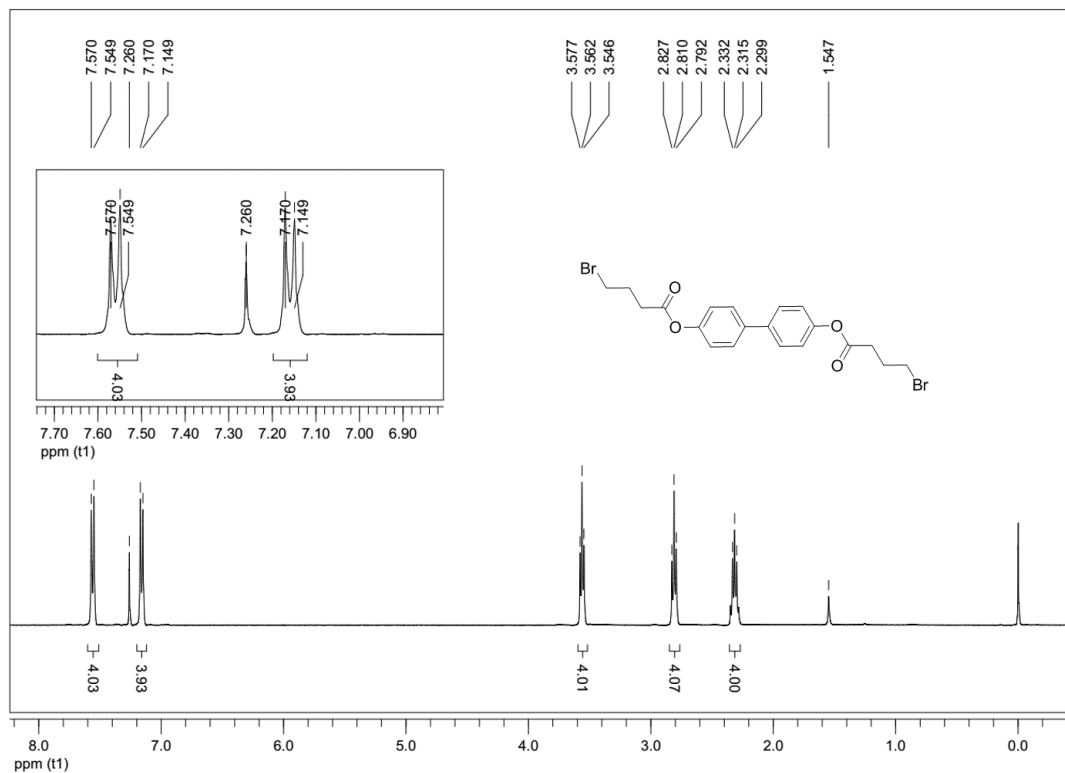

The  $^{13}\text{C}$  NMR spectra of compound **9a**

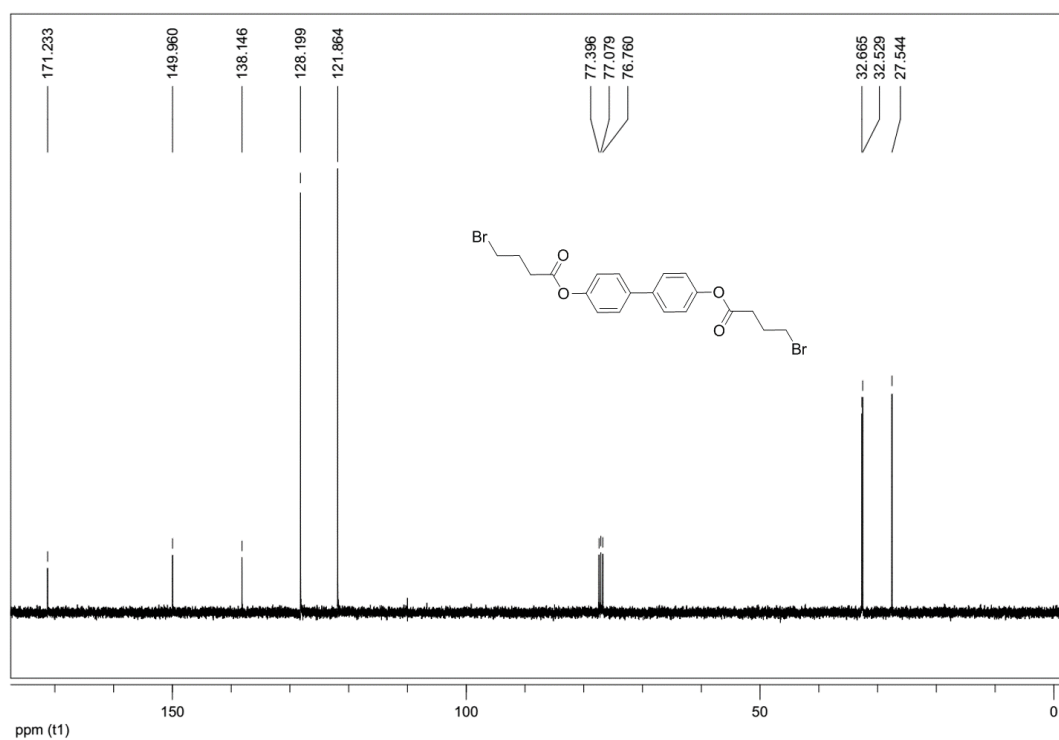

The  $^1\text{H}$  NMR spectra of compound **9b**

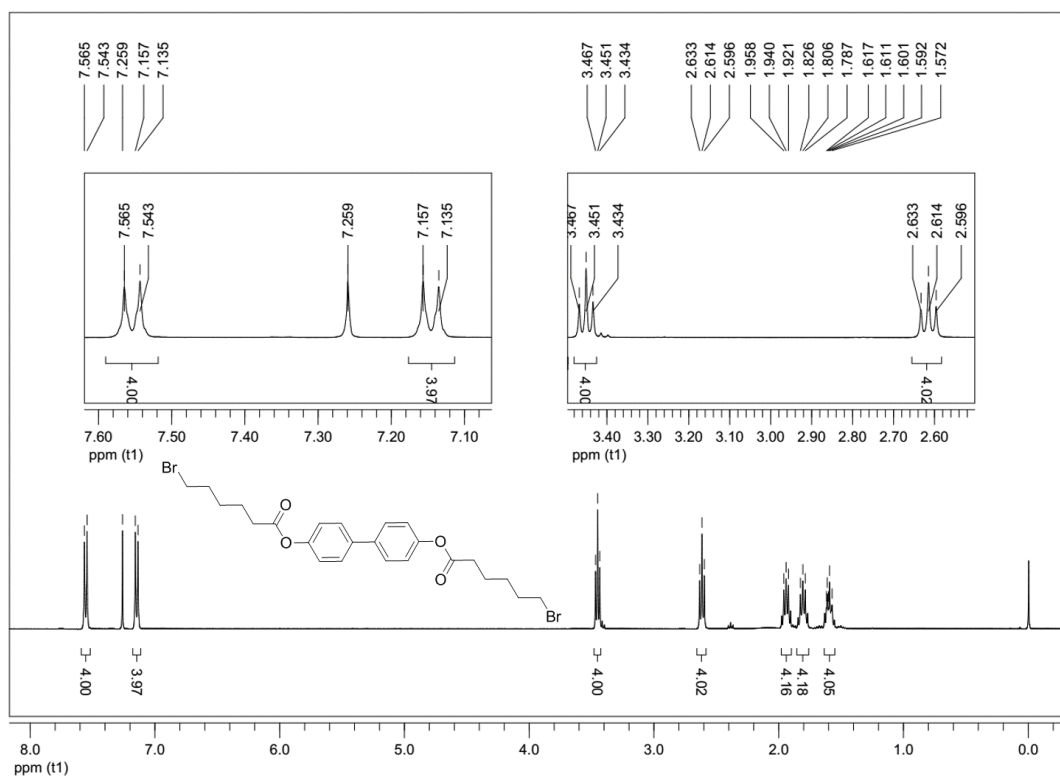

The  $^{13}\text{C}$  NMR spectra of compound **9b**

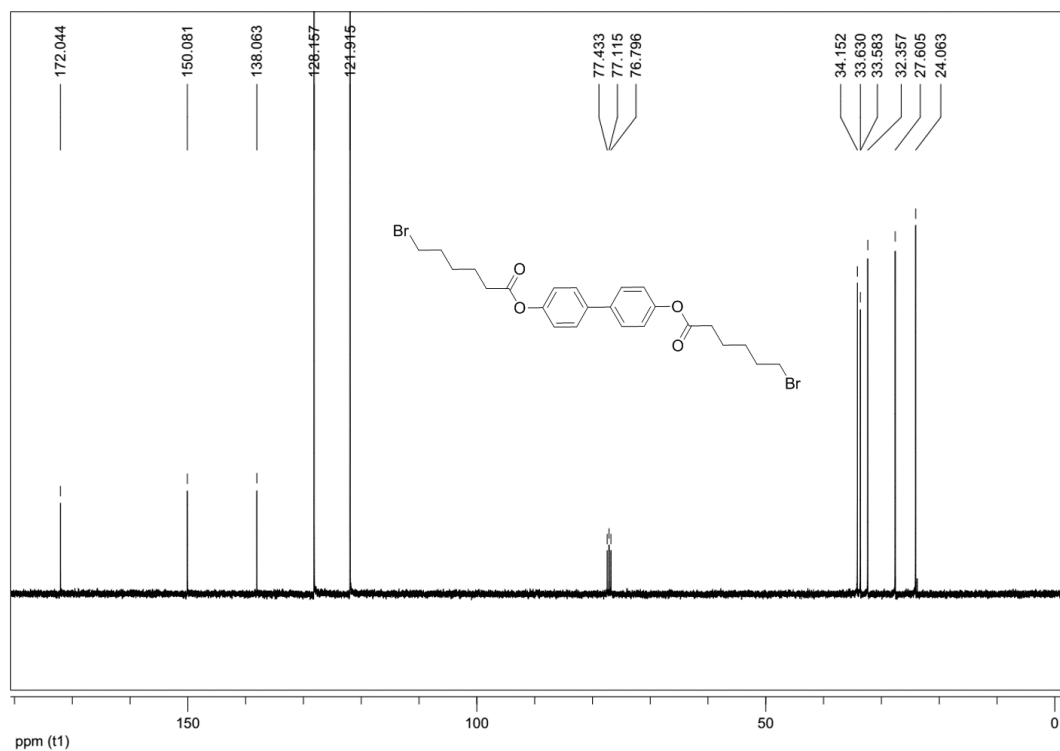

The  $^1\text{H}$  NMR spectra of compound **10a**

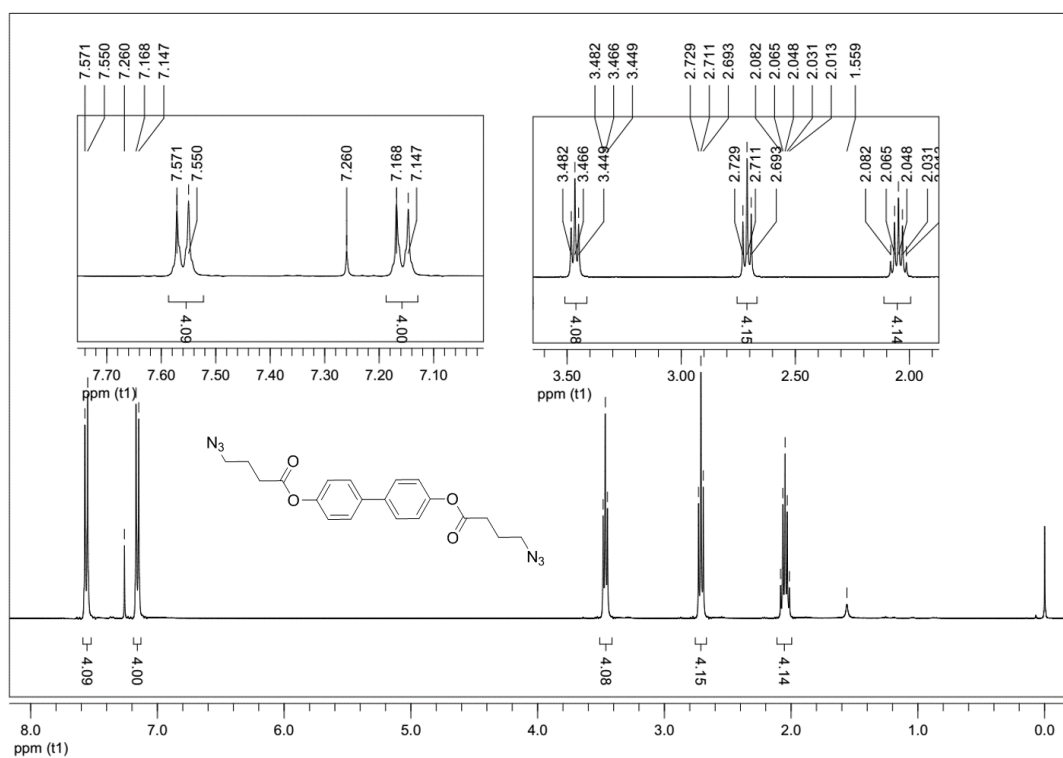

The  $^{13}\text{C}$  NMR spectrum of compound **10a**

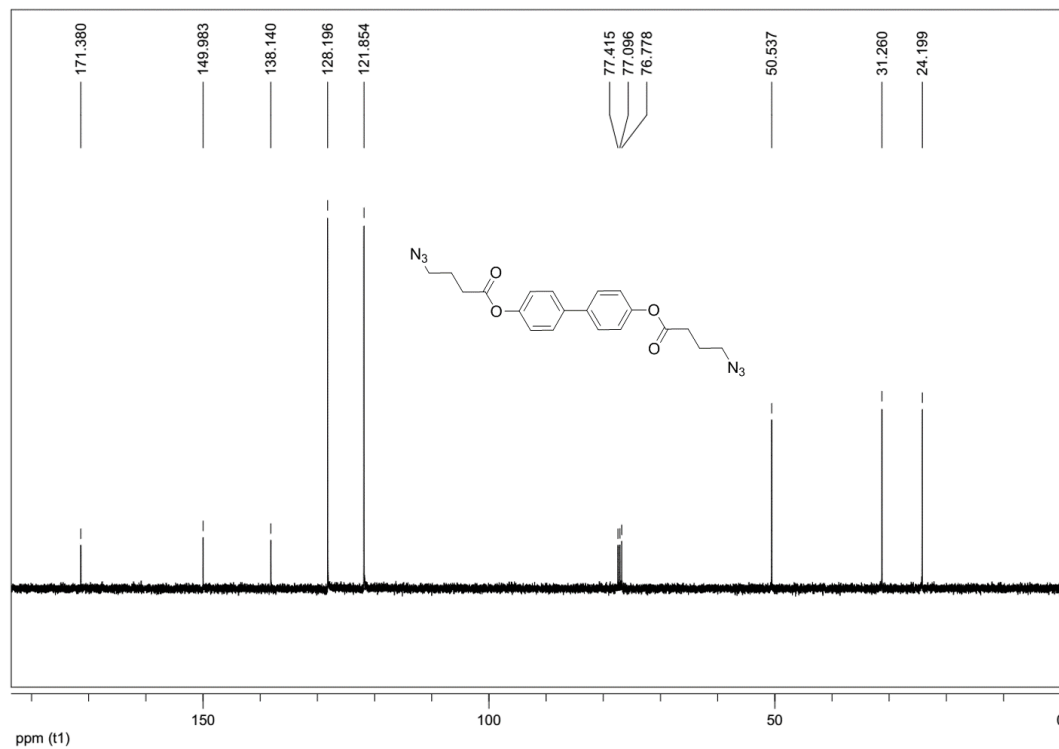

The  $^1\text{H}$  NMR spectra of compound **10b**

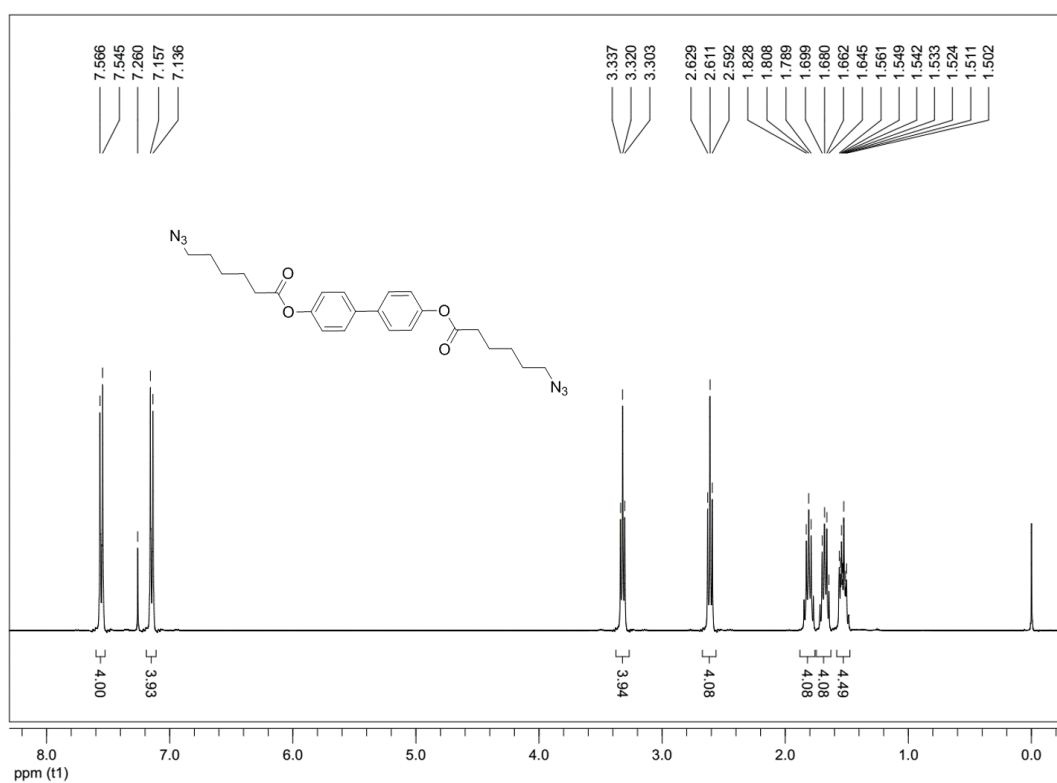

The  $^{13}\text{C}$  NMR spectra of compound **10b**

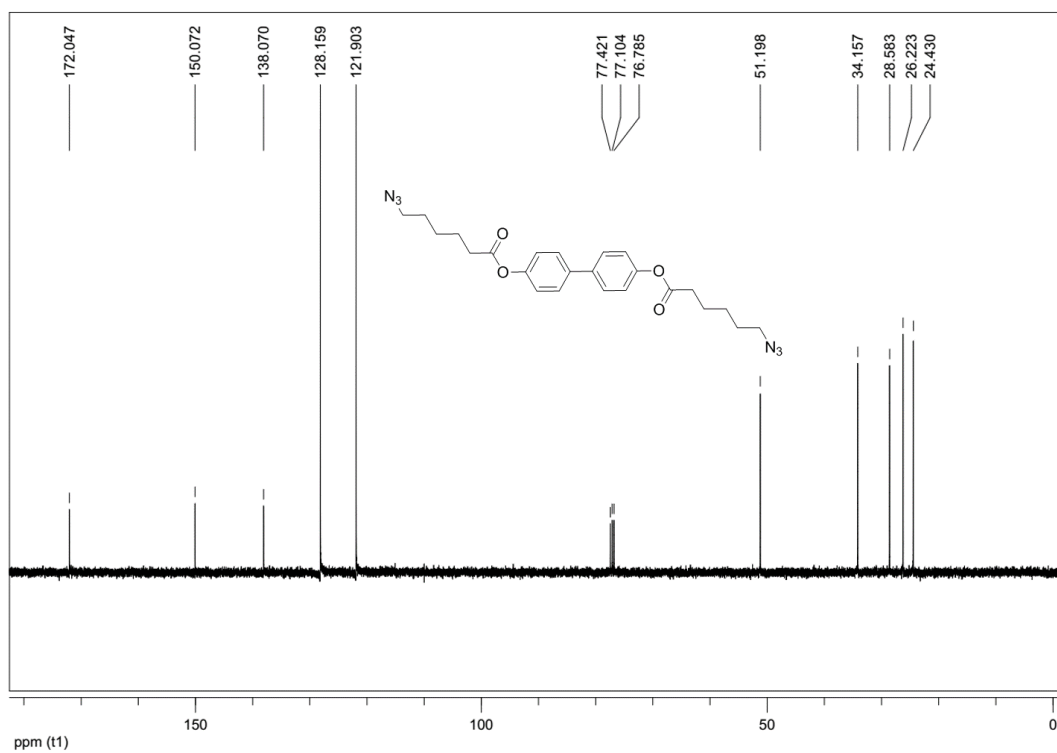

**11a**

<sup>13</sup>C NMR spectrum (CDCl<sub>3</sub>) of compound **11a**. The spectrum displays peaks in the aromatic, carbonyl, and aliphatic regions. The following table lists the chemical shifts (ppm) for the observed peaks:

| Chemical Shift (ppm) |
|----------------------|
| 149.756              |
| 149.227              |
| 149.161              |
| 149.103              |
| 149.046              |
| 148.917              |
| 148.801              |
| 148.746              |
| 148.720              |
| 148.674              |
| 146.735              |
| 146.467              |
| 142.018              |
| 137.877              |
| 130.502              |
| 127.913              |
| 125.097              |
| 124.933              |
| 123.946              |
| 123.844              |
| 123.298              |
| 123.224              |
| 123.132              |
| 123.039              |
| 122.960              |
| 122.891              |
| 121.647              |
| 110.301              |
| 110.067              |
| 107.232              |
| 107.165              |
| 107.114              |
| 107.047              |
| 106.831              |
| 106.578              |
| 106.521              |
| 106.277              |
| 77.351               |
| 77.034               |
| 76.716               |
| 69.690               |
| 69.634               |
| 69.596               |
| 69.452               |
| 68.416               |
| 68.294               |
| 69.200               |
| 69.084               |
| 67.428               |
| 57.294               |
| 53.385               |
| 53.366               |
| 47.429               |
| 31.715               |
| 31.651               |
| 31.596               |
| 30.694               |
| 29.442               |



The  $^1\text{H}$  NMR spectra of compound **11b**

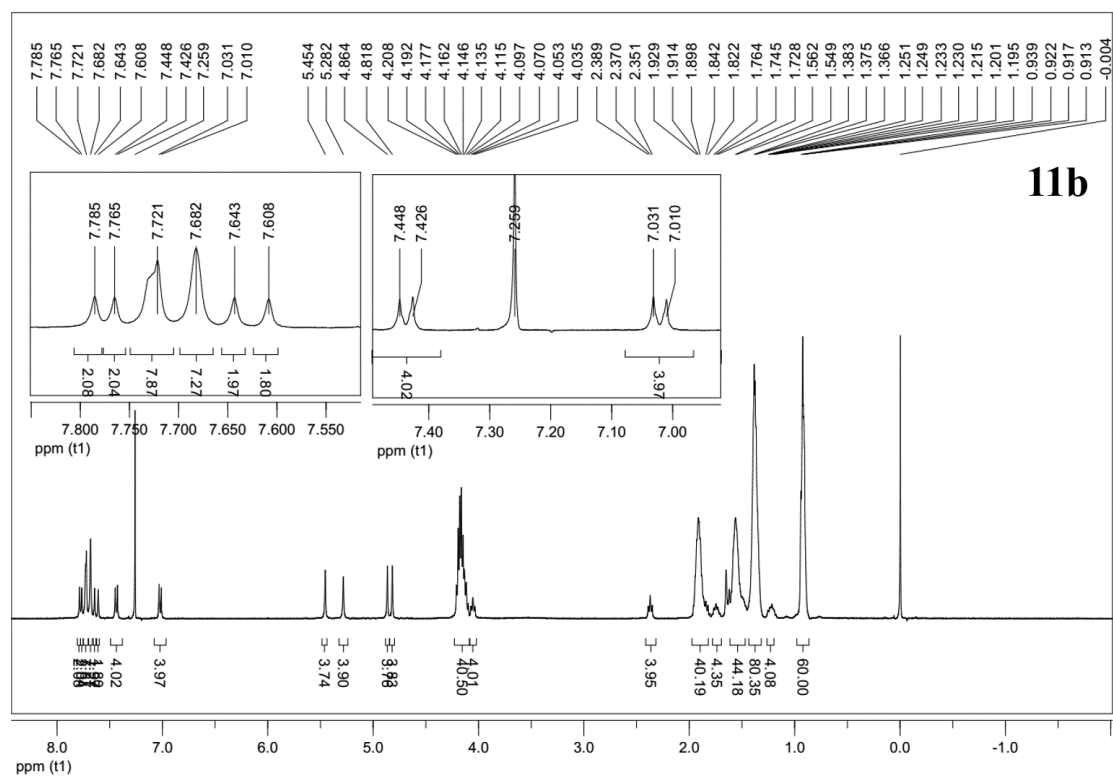

The  $^{13}\text{C}$  NMR spectra of compound **11b**

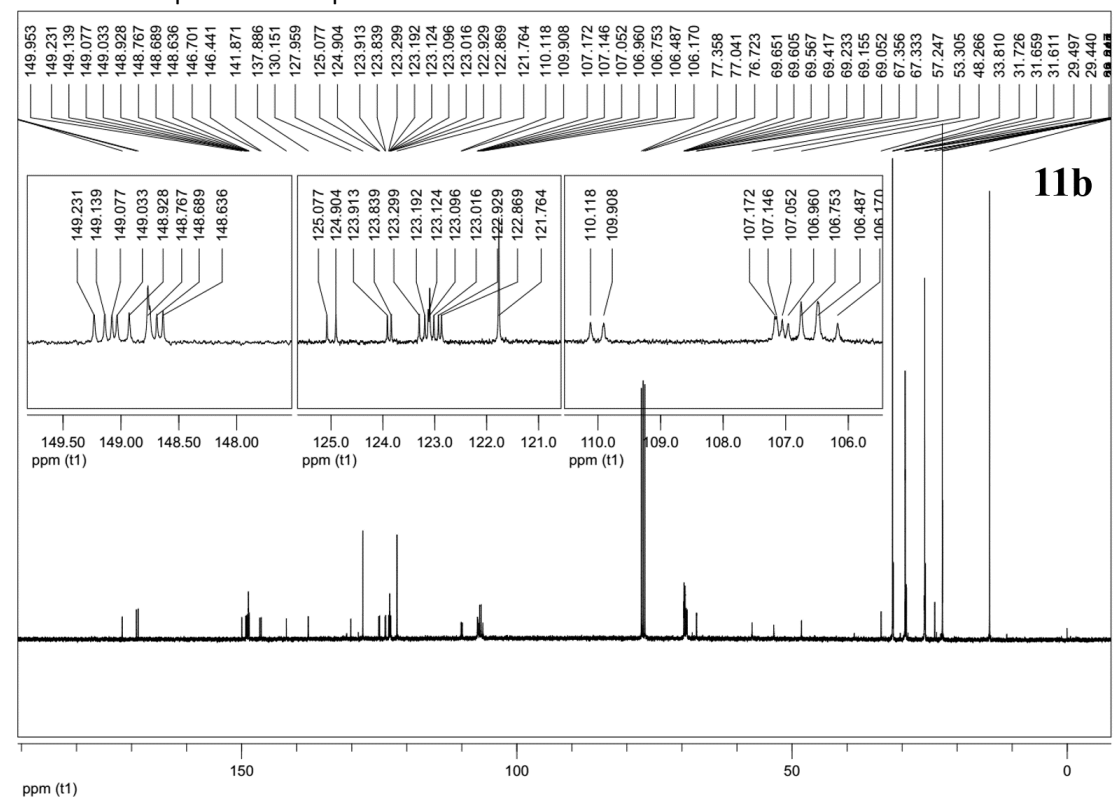

Supplement: c7nj02695a1.pdf [file c7nj02695a1.pdf]
